# Supplementary material for: Evidence of Season-Dependency in Vegetation Effects on Macrofauna in Temperate Seagrass Meadows (Baltic Sea)
Source: PLoS One. 2014 Jul 7;9(7):e100788. doi: 10.1371/journal.pone.0100788 (PMC4085053; doi:10.1371/journal.pone.0100788)
Supplement: Table S1 — Taxonomic composition and densities of taxa in samples collected at two stations, on two bottom types and in five months. Average values for replicate samples collected at the same stations, bottom types (veg - vegetated bottom, unveg - bare sands) and months are presented. (XLSX) [file pone.0100788.s001.xlsx]

## Sheet: Arkusz1
	October2010_Jas_Veg	October2010_Jas_Unveg	October2010_RM_Veg	October2010_RM_Unveg	March_Jas_Veg	March_Jas_Unveg	March_RM_Veg	March_RM_Unveg	June_Jas_Veg	June_Jas_Unveg	June_RM_Veg	June_RM_Unveg	July_Jas_Veg	July_Jas_Unveg	July_RM_Veg	July_RM_Unveg	October2011_Jas_Veg	October2011_Jas_Unveg	October2011_RM_Veg	October2011_RM_Unveg
Balanus improvissus	5.19953	0	23.3979	0	1.29988	0	0	5.19953	1.29988	0	1.29988	0	2.59977	0	0	0	10.3991	0	0	0
Bryozoa nd	7.7993	0	18.1984	0	5.19953	0	10.3991	1.29988	9.09918	0	7.7993	0	20.7981	0	19.4982	0	10.3991	1.29988	16.8985	0
Cerastoderma glaucum	353.568	218.38	479.657	868.322	318.471	345.769	444.56	999.61	289.874	70.1937	575.848	129.988	218.38	163.785	601.846	80.5927	150.786	25.9977	110.49	25.9977
Chironomidae larvae	12.9988	18.1984	22.098	5.19953	40.2964	12.9988	38.9965	2.59977	19.4982	0	25.9977	0	252.177	90.9918	214.481	3.89965	16.8985	0	44.196	6.49942
Corophium multisetosum	1.29988	6.49942	0	0	0	2.59977	1.29988	1.29988	1.29988	23.3979	0	0	0	0	0	0	0	0	0	0
Corophium sp.juv.	12.9988	94.8915	5.19953	10.3991	37.6966	77.993	2.59977	5.19953	2.59977	33.797	0	0	2.59977	59.7946	1.29988	0	46.7958	2.59977	6.49942	6.49942
Corophium volutator	0	0	0	0	0	0	1.29988	0	0	1.29988	0	5.19953	0	0	0	0	0	0	0	0
Crangon crangon	1.29988	0	0	0	0	0	0	0	0	0	0	0	0	0	0	0	0	0	0	0
Cyathura carinata	42.8961	31.1972	1.29988	3.89965	92.2917	37.6966	3.89965	6.49942	64.9942	80.5927	5.19953	1.29988	174.184	227.48	40.2964	0	61.0945	233.979	7.7993	5.19953
Cyprideis torosa	0	0	0	0	0	0	0	0	0	0	0	0	0	0	1.29988	0	1.29988	0	0	0
Cytheromorpha fuscata	0	0	0	0	0	0	0	0	0	0	0	0	0	0	1.29988	0	0	0	0	0
Cytherura libba	0	0	0	0	0	0	0	0	0	0	0	0	0	0	19.4982	0	0	0	0	0
Dendrocelum lacteum	0	0	0	0	0	0	0	0	54.5951	76.6931	0	0	0	0	0	0	0	0	0	0
Eurydice pulchra	25.9977	1.29988	2.59977	0	1.29988	0	1.29988	0	0	0	0	0	0	0	2.59977	0	2.59977	0	0	0
Gammarus oceanicus	3.89965	0	1.29988	0	10.3991	5.19953	3.89965	0	9.09918	0	0	0	11.6989	0	14.2987	0	10.3991	0	12.9988	0
Gammarus salinus	3.89965	0	0	0	10.3991	9.10178	6.49942	0	3.89965	0	7.7993	0	36.3967	0	29.8973	0	22.098	0	0	0
Gammarus sp. juv.	76.6931	9.09918	15.5986	12.9988	35.0968	24.6978	20.7981	3.89965	213.181	5.19953	110.49	9.09918	162.485	16.8985	162.485	2.59977	40.2964	102.691	40.2964	174.184
Gammarus tigrinus	0	0	0	0	6.49942	0	0	0	1.29988	0	0	0	0	0	0	0	0	0	0	0
Gammarus zaddachi	10.3991	1.29988	1.29988	0	6.49942	0	1.29988	0	15.5986	0	0	0	16.8985	0	6.49942	0	7.7993	0	0	0
Hydrobia sp.	1336.28	2087.61	5254.13	5377.62	4792.67	8029.38	6096.45	5863.77	2603.67	1341.48	4368.91	2792.15	2486.68	752.632	8174.96	2517.87	2112.31	280.775	2346.29	3257.51
Idotea balthica	116.989	2.59977	41.5963	0	15.5986	0	19.4982	0	7.7993	0	10.3991	0	12.9988	0	18.1984	0	50.6954	1.29988	20.7981	0
Idotea chelipes	63.6943	0	14.2987	0	75.3932	1.29988	7.7993	0	24.6978	0	6.49942	0	51.9953	0	27.2975	0	150.786	1.29988	59.7946	0
Idotea sp. juv.	0	0	0	0	0	0	0	0	25.9977	0	71.4936	0	23.3979	0	5.19953	0	10.3991	0	1.29988	0
Jaera sp.	16.8985	0	0	0	61.0945	1.29988	0	0	92.2917	0	1.29988	0	180.684	1.29988	0	0	16.8985	1.29988	0	0
Limapontia capitata	0	0	0	0	0	0	0	0	0	0	0	0	0	0	12.9988	0	0	0	1.29988	0
Lymnaea peregra	106.59	9.09918	159.886	9.09918	25.9977	3.89965	0	1.29988	10.3991	3.89965	0	0	32.4971	0	0	0	0	0	0	0
Macoma balthica	9.09918	75.3932	10.3991	19.4982	76.6931	18.1984	6.49942	32.4971	50.6954	15.5986	18.1984	18.1984	36.3967	119.589	22.098	152.086	7.7993	9.09918	48.0957	22.098
Marenzelleria neglecta	2.59977	16.8985	0	0	7.7993	11.6989	1.29988	1.29988	5.19953	3.89965	0	0	19.4982	25.9977	1.29988	1.29988	45.4959	50.6954	15.5986	2.59977
Mya arenaria	16.8985	22.098	15.5986	25.9977	61.0945	20.7981	23.3979	18.1984	29.8973	10.3991	22.098	9.09918	40.2964	10.3991	24.6978	58.4947	12.9988	5.19953	7.7993	1.29988
Mysis sp. juv.	0	0	0	0	0	0	0	0	0	1.29988	0	0	0	0	0	0	0	0	0	0
Mysis mixta	0	0	0	0	0	0	0	0	0	0	0	0	0	3.89965	0	0	0	0	0	0
Mytilus edulis	24.6978	0	12.9988	1.29988	24.6978	12.9988	23.3979	6.49942	45.4959	1.29988	11.6989	0	49.3956	0	23.3979	0	38.9965	3.89965	40.2964	0
Neomysis integer	0	0	0	0	2.59977	0	0	0	0	0	0	0	0	0	0	0	0	0	0	0
Nereis diversicolor	315.872	252.177	231.379	215.781	327.571	365.267	261.276	219.68	236.579	85.7923	201.482	127.389	250.877	141.687	384.765	31.1972	97.4912	16.8985	258.677	109.19
Oligochaeta nd	1023.01	1107.5	557.65	389.965	1596.26	1645.65	993.111	993.111	1526.06	960.614	1168.59	861.822	967.113	357.468	993.111	449.76	752.632	131.288	1904.33	569.349
Palaemon adspersus	0	0	0	0	0	0	0	0	0	0	0	0	0	0	0	0	1.29988	0	0	0
Palaemon elegans	0	0	0	0	0	0	0	0	0	0	0	0	0	0	2.59977	0	0	0	0	0
Piscicola geometra	0	0	0	0	1.29988	1.29988	0	0	0	0	0	0	0	0	0	0	0	0	0	0
Planaria torva	5.19953	5.19953	0	2.59977	5.19953	1.29988	0	1.29988	10.3991	38.9965	2.59977	9.09918	18.1984	9.09918	15.5986	0	0	0	0	0
Porcellio scaber	0	0	0	0	0	0	1.29988	0	0	0	0	0	0	0	0	0	0	0	0	0
Priapulus caudatus	1.29988	0	0	0	0	0	0	0	0	0	0	1.29988	0	0	0	0	0	0	0	0
Pygospio elegans	187.183	400.364	46.7958	68.8938	204.082	193.683	159.886	123.489	141.687	831.925	100.091	59.7946	258.677	270.376	40.2964	10.3991	109.19	132.588	144.287	11.6989
Rhithropanopeus harrisi	0	0	1.29988	0	0	0	10.3991	0	1.29988	0	6.49942	0	0	0	9.09918	0	0	0	7.7993	0
Sphaeroma hookeri	0	0	0	0	6.49942	0	3.89965	0	0	0	0	0	1.29988	0	0	0	0	0	0	0
Streblospio shrubsoli	0	0	0	0	0	0	0	0	3.89965	0	0	0	0	0	0	0	1.29988	0	1.29988	0
Theodoxus fluviatillis	53.2952	15.5986	0	0	144.287	57.1949	135.188	16.8985	171.585	2.59977	100.091	6.49942	128.688	0	132.588	2.59977	71.4936	1.29988	45.4959	0
